# Supplementary material for: Sex Differences in Cognitive Abilities Among Children With the Autosomal Dominant Alzheimer Disease Presenilin 1 E280A Variant From a Colombian Cohort
Source: PubMed Central journal article supplement (PMC8408665; doi:10.1001/jamanetworkopen.2021.21697), 2021-08-31
Supplement: jamanetwopen-e2121697-s001.pdf [file jamanetwopen-e2121697-s001.pdf]

## Supplemental Online Content

Fox-Fuller JT, Artola A, Chen K, et al. Sex differences in cognitive abilities among children with the autosomal dominant Alzheimer disease presenilin 1 E280A variant from a Colombian cohort. *JAMA Netw Open*. 2021;4(8):e2121697. doi:10.1001/jamanetworkopen.2021.21697

**eTable 1.** Descriptive Statistics of 457 Children With a Parent With Variant

**eTable 2.** Descriptive Statistics of 1354 Children in Full Sample by Sex

**eTable 3.** Descriptive Statistics of 457 Children With a Parent With Variant by Sex

**eTable 4.** Performance on *Wechsler Intelligence Scale for Children, Fourth Edition* Indices by Sex in Full Sample

**eTable 5.** Performance on *Wechsler Intelligence Scale for Children, Fourth Edition* Indices by Sex When a Parent Has Variant

**eTable 6.** Performance on *Wechsler Intelligence Scale for Children, Fourth Edition* Indices by Sex and Genetic Status When a Parent Has Variant

This supplemental material has been provided by the authors to give readers additional information about their work.

**eTable 1.** Descriptive Statistics of 457 Children With a Parent With Variant

|                                | <i>PSEN1</i>                     |                                      |                       |
|--------------------------------|----------------------------------|--------------------------------------|-----------------------|
| <b>Variable</b>                | <b>Carriers,<br/>Mean, n=265</b> | <b>Non-Carriers,<br/>Mean, n=192</b> | <b><i>p</i>-value</b> |
| <b>Sex (%)</b>                 |                                  |                                      |                       |
| Male                           | 124 (46.4%)                      | 104 (54.2%)                          | 0.12                  |
| Female                         | 141 (53.6%)                      | 88 (45.8%)                           |                       |
| <b>Age in years (SD)</b>       |                                  |                                      |                       |
| Mean                           | 11.60 (2.71)                     | 12.02 (2.71)                         | 0.10                  |
| Range                          | 6-16                             | 8-16                                 |                       |
| <b>Years of education (SD)</b> |                                  |                                      |                       |
| Mean                           | 5.35 (2.68)                      | 5.62 (2.73)                          | 0.30                  |
| Range                          | 0-12                             | 0-12                                 |                       |
| <b>Urbanity (%)</b>            |                                  |                                      |                       |
| Urban                          | 184 (69.4%)                      | 112 (58.3%)                          | 0.01*                 |
| Rural                          | 81 (30.6%)                       | 80 (41.7%)                           |                       |

|                |             |             |      |
|----------------|-------------|-------------|------|
| <b>SES (%)</b> |             |             |      |
| Lower-low      | 91 (34.3%)  | 60 (31.3%)  | 0.48 |
| Low            | 120 (45.3%) | 100 (52.1%) |      |
| Upper-low      | 52 (19.6%)  | 30 (15.6%)  |      |
| Medium         | 0 (0%)      | 1 (0.5%)    |      |
| Medium-high    | 1 (0.4%)    | 0 (0.5%)    |      |
| High           | 1 (0.4%)    | 1 (0.5%)    |      |
|                |             |             |      |

Abbreviations: PSEN1 =: Presenilin 1; SD = Standard deviation; SES =Socioeconomic status.

Note: P-value is calculated using Welch's two independent t-test to compare groups by age and education and Pearson's chi-squared test to compare groups by sex, urbanity, and SES.

p-values are calculated relative to males (Bonferroni correction)

\*p<.05

**eTable 2.** Descriptive Statistics of 1354 Children in Full Sample by Sex

| <b>Variable</b>                | <b>Males, n=659</b> | <b>Females, n=695</b> | <b>p-value</b> |
|--------------------------------|---------------------|-----------------------|----------------|
| <b>Carrier status (%)</b>      |                     |                       |                |
| <i>PSENI</i> carrier           | 124 (54.4%)         | 141 (61.6%)           | 0.50           |
| Non-carrier                    | 535 (45.6%)         | 554 (38.4%)           |                |
| <b>Age in years (SD)</b>       |                     |                       |                |
| Mean                           | 11.63 (2.66)        | 11.64 (2.62)          | 0.95           |
| Range                          | 6-16                | 7-16                  |                |
| <b>Years of education (SD)</b> |                     |                       |                |
| Mean                           | 5.08 (2.66)         | 5.64 (2.65)           | <.001***       |
| Range                          | 0-12                | 1-12                  |                |
| <b>Urbanity (%)</b>            |                     |                       |                |
| Urban                          | 450 (68.3%)         | 461 (66.3%)           | 0.44           |
| Rural                          | 209 (31.7%)         | 234 (33.7%)           |                |
| <b>SES (%)</b>                 |                     |                       |                |

|             |             |             |      |
|-------------|-------------|-------------|------|
| Lower-low   | 210 (31.9%) | 237 (34.1%) | 0.24 |
| Low         | 288 (43.7%) | 313 (45.0%) |      |
| Upper-low   | 141 (21.4%) | 134 (19.3%) |      |
| Medium      | 16 (2.4%)   | 8 (1.2%)    |      |
| Medium-high | 2 (0.3%)    | 3 (0.4%)    |      |
| High        | 2 (0.3%)    | 0 (0%)      |      |
|             |             |             |      |
|             |             |             |      |

Abbreviations: PSEN1 =: Presenilin 1; SD = Standard deviation; SES =Socioeconomic status.

Note: P-value is calculated using Welch's two independent t-test to compare groups by age and education and Pearson's chi-squared test to compare groups by carrier status, urbanity, and SES.

\* $p < .05$   
 \*\* $p < .01$   
 \*\*\* $p < .001$

**eTable 3.** Descriptive Statistics of 457 Children With a Parent With Variant by Sex

| <b>Variable</b>                | <b>Males, n=228</b> | <b>Females, n=229</b> | <b>p-value</b> |
|--------------------------------|---------------------|-----------------------|----------------|
| <b>Carrier status (%)</b>      |                     |                       |                |
| <i>PSEN1</i> carrier           | 124 (54.4%)         | 141 (61.6%)           | 0.12           |
| Non-carrier                    | 104 (45.6%)         | 88 (38.4%)            |                |
| <b>Age in years (SD)</b>       |                     |                       |                |
| Mean                           | 11.78 (2.71)        | 11.78 (2.72)          | 0.99           |
| Range                          | 6-16                | 8-16                  |                |
| <b>Years of education (SD)</b> |                     |                       |                |
| Mean                           | 5.16 (2.70)         | 5.76 (2.68)           | 0.02*          |
| Range                          | 0-12                | 1-12                  |                |
| <b>Urbanity (%)</b>            |                     |                       |                |
| Urban                          | 150 (65.8%)         | 146 (63.8%)           | 0.65           |
| Rural                          | 78 (34.2%)          | 83 (36.2%)            |                |
| <b>SES (%)</b>                 |                     |                       |                |

|             |             |             |      |
|-------------|-------------|-------------|------|
| Lower-low   | 71 (31.2%)  | 80 (34.9%)  | 0.45 |
| Low         | 110 (48.2%) | 110 (48.1%) |      |
| Upper-low   | 43 (18.9%)  | 39 (17.0%)  |      |
| Medium      | 1 (0.4%)    | 0 (0%)      |      |
| Medium-high | 1 (0.4%)    | 0 (0%)      |      |
| High        | 2 (0.9%)    | 0 (0%)      |      |
|             |             |             |      |
|             |             |             |      |

Abbreviations: PSEN1 =: Presenilin 1; SD = Standard deviation; SES =Socioeconomic status.

Note: P-value is calculated using Welch's two independent t-test to compare groups by age and education and Pearson's chi-squared test to compare groups by carrier status, urbanity, and SES.

\* $p < .05$

**eTable 4.** Performance on *Wechsler Intelligence Scale for Children, Fourth Edition* Indices by Sex in Full Sample

| <b>WISC-IV Index</b>    | <b>Males<br/>WISC-IV<br/>Index Standard<br/>Score, Mean<br/>(95% CI),<br/>n=659</b> | <b>Females WISC-<br/>IV Index<br/>Standard Score,<br/>Mean (95% CI),<br/>n=695</b> |
|-------------------------|-------------------------------------------------------------------------------------|------------------------------------------------------------------------------------|
| Verbal<br>Comprehension | <b>88.69 (87.54-<br/>89.84)</b>                                                     | 90.81 (89.73-<br>91.90), <i>p</i> =.009**                                          |
| Perceptual<br>Reasoning | <b>91.56 (90.47-<br/>92.65)</b>                                                     | 93.27 (92.23-<br>94.30), <i>p</i> =.03*                                            |
| Working Memory          | <b>90.27 (89.21-<br/>91.34)</b>                                                     | 92.99 (91.98-<br>93.99), <i>p</i> <.001***                                         |
| Processing Speed        | 86.94 (85.20-<br>88.06)                                                             | 87.88 (86.82-88.94)                                                                |

*p*-values are calculated relative to males (Bonferroni correction)

\**p*<.05

\*\**p*<.01

\*\*\**p*<.001

Abbreviations: WISC-IV = Wechsler Intelligence Scale for Children, Fourth Edition; CI = Confidence Interval

Note: Data are reported as the mean (95% CI) based on modified marginal means for the model with the co-variates, *p*-value for the univariate general linear model (GLM).

<sup>a</sup> Calculated using GLM with urbanity, education, and socioeconomic status entered as covariates, and PSEN1 carrier status, sex, and the interaction of carrier status and sex entered as fixed factors.



**eTable 5.** Performance on *Wechsler Intelligence Scale for Children, Fourth Edition* Indices by Sex When a Parent Has Variant

| <b>WISC-IV Index</b> | <b>Males WISC-IV Index Standard Score, Mean (95% CI), n=228</b> | <b>Females WISC-IV Index Standard Score, Mean (95% CI), n=229</b> |
|----------------------|-----------------------------------------------------------------|-------------------------------------------------------------------|
| Verbal Comprehension | 89.84 (88.24-91.44)                                             | 91.69 (90.05-93.32)                                               |
| Perceptual Reasoning | <b>91.37 (89.93-92.81)</b>                                      | 93.62 (92.15-95.09), <i>p</i> =.03*                               |
| Working Memory       | <b>90.26 (88.92-91.60)</b>                                      | 93.75 (92.38-95.11), <i>p</i> <.001***                            |
| Processing Speed     | 86.72 (85.22-88.20)                                             | 88.04 (86.51-89.57)                                               |

*p*-values are calculated relative to males (Bonferroni correction)

\**p*<.05

\*\**p*<.01

\*\*\**p*<.001

Abbreviations: WISC-IV = Wechsler Intelligence Scale for Children, Fourth Edition; CI = Confidence Interval; PSEN=Preseini1

Note: Data are reported as the mean (95% CI) based on modified marginal means for the model with the co-variates, *p*-value for the univariate general linear model (GLM).

<sup>a</sup> Calculated using GLM with urbanity, education, and socioeconomic status entered as covariates, and PSEN1 carrier status, sex, and the interaction of carrier status and sex entered as fixed factors.

**eTable 6.** Performance on *Wechsler Intelligence Scale for Children, Fourth Edition* Indices by Sex and Genetic Status When a Parent Has Variant

| WISC-IV Index           | <i>PSEN1</i><br>Male Carriers,<br>WISC-IV Index<br>Standard Score,<br>Mean (95% CI),<br>n=124 | <i>PSEN1</i><br>Female Carriers,<br>WISC-IV Index<br>Standard Score,<br>Mean (95% CI),<br>n=141 | Male Non-<br>Carriers<br>WISC-IV<br>Index Standard<br>Score, Mean<br>(95% CI),<br>n=535 | Female Non-<br>Carriers, WISC-<br>IV Index<br>Standard Score,<br>Mean (95% CI),<br>n=554 |
|-------------------------|-----------------------------------------------------------------------------------------------|-------------------------------------------------------------------------------------------------|-----------------------------------------------------------------------------------------|------------------------------------------------------------------------------------------|
| Verbal<br>Comprehension | 88.51 (86.34-<br>90.68)                                                                       | 91.48 (89.46-93.51)                                                                             | 91.16 (88.81-<br>93.52)                                                                 | 91.89 (89.32-94.45)                                                                      |
| Perceptual<br>Reasoning | 91.30 (89.35-<br>93.26)                                                                       | 93.89 (92.07-95.71)                                                                             | 91.44 (89.32-<br>93.55)                                                                 | 93.35 (91.05-95.66)                                                                      |
| Working Memory          | <b>88.69 (86.87-<br/>90.50)</b>                                                               | 93.71 (92.01-<br>95.40), <i>p</i> =.001**                                                       | 91.83 (89.86-<br>93.80)                                                                 | 93.79 (91.64-<br>95.93), <i>p</i> =.003**                                                |
| Processing Speed        | 85.53 (83.50-<br>87.56)                                                                       | 88.22 (86.33-90.12)                                                                             | 87.91 (85.71-<br>90.11)                                                                 | 87.85 (85.45-90.26)                                                                      |

*p*-values are calculated relative to male *PSEN1* E280A carriers with Bonferroni correction

\*\**p*<.01

Abbreviations: WISC-IV = Wechsler Intelligence Scale for Children, Fourth Edition; *PSEN1* = Presenilin1; CI = Confidence Interval

Note: Data are reported as the mean (95% CI) based on modified marginal means for the model with the co-variates, *p*-value for the univariate general linear model (GLM).

<sup>a</sup> Calculated using GLM with urbanity, education, and socioeconomic status entered as covariates, and *PSEN1* carrier status, sex, and the interaction of carrier status and sex entered as fixed factors.
